# Supplementary material for: Effect of an Enriched Protein Drink on Muscle Mass and Glycemic Control during Combined Lifestyle Intervention in Older Adults with Obesity and Type 2 Diabetes: A Double-Blind RCT
Source: MDPI journal article supplement (doi:10.3390/nu13010064), 2020-12-28
Supplement: s1 [file s1]

**Table S2.** Outcome measures for test and control group with intervention effect, excluding four subjects with pre-diabetes (sensitivity analysis).

|                                            | Test group        | Control group     | Intervention effect<br>Beta (95% CI) <sup>a</sup> |
|--------------------------------------------|-------------------|-------------------|---------------------------------------------------|
| Body weight <sup>b</sup> , kg              |                   |                   |                                                   |
| Baseline (n)                               | 96.74 ± 2.02 (59) | 99.25 ± 1.93 (59) |                                                   |
| Change (n)                                 | -2.21 ± 0.42 (48) | -2.93 ± 0.41 (52) | 0.72 (-0.44 to 1.89)                              |
| P value                                    | <0.001            | <0.001            | 0.221                                             |
| BMI <sup>b</sup> , kg/m <sup>2</sup>       |                   |                   |                                                   |
| Baseline (n)                               | 33.1 ± 0.6 (59)   | 33.8 ± 0.6 (59)   |                                                   |
| Change (n)                                 | -0.7 ± 0.1 (48)   | -1.0 ± 0.1 (52)   | 0.2 (-0.2 to 0.6)                                 |
| P value                                    | <0.001            | <0.001            | 0.236                                             |
| Leg muscle mass <sup>b</sup> , kg          |                   |                   |                                                   |
| Baseline (n)                               | 18.76 ± 0.37 (58) | 19.21 ± 0.35 (59) |                                                   |
| Change (n)                                 | 0.24 ± 0.11 (47)  | -0.08 ± 0.10 (52) | 0.32 (0.03 to 0.62)                               |
| P value                                    | 0.025             | 0.423             | 0.030                                             |
| Appendicular muscle mass <sup>b</sup> , kg |                   |                   |                                                   |
| Baseline (n)                               | 25.33 ± 0.49 (56) | 25.91 ± 0.47 (59) |                                                   |
| Change (n)                                 | 0.39 ± 0.13 (45)  | -0.03 ± 0.12 (49) | 0.42 (0.06 to 0.78)                               |
| P value                                    | 0.003             | 0.835             | 0.021                                             |
| Total lean mass <sup>b</sup> , kg          |                   |                   |                                                   |
| Baseline (n)                               | 60.74 ± 1.04 (57) | 62.24 ± 1.00 (59) |                                                   |
| Change (n)                                 | 0.57 ± 0.27 (46)  | -0.46 ± 0.26 (50) | 1.03 (0.29 to 1.77)                               |
| P value                                    | 0.038             | 0.077             | 0.007                                             |
| Fat mass <sup>b</sup> , kg                 |                   |                   |                                                   |
| Baseline (n)                               | 34.62 ± 1.19 (58) | 35.39 ± 1.14 (59) |                                                   |
| Change (n)                                 | -2.60 ± 0.34 (47) | -2.50 ± 0.33 (50) | -0.10 (-1.05 to 0.84)                             |
| P value                                    | <0.001            | <0.001            | 0.830                                             |
| Waist circumference <sup>b</sup> , cm      |                   |                   |                                                   |
| Baseline (n)                               | 113.5 ± 1.4 (58)  | 115.4 ± 1.3 (58)  |                                                   |
| Change (n)                                 | -3.4 ± 0.5 (47)   | -3.8 ± 0.5 (50)   | 0.4 (-1.1 to 1.8)                                 |
| P value                                    | <0.001            | <0.001            | 0.625                                             |
| VAT <sup>b</sup> , cm <sup>2</sup>         |                   |                   |                                                   |
| Baseline (n)                               | 178.8 ± 7.3 (59)  | 182.1 ± 7.0 (59)  |                                                   |
| Change (n)                                 | -18.7 ± 4.1 (48)  | -17.1 ± 4.0 (52)  | -1.6 (-12.9 to 9.7)                               |
| P value                                    | <0.001            | <0.001            | 0.779                                             |
| Fasting plasma glucose, mmol/L             |                   |                   |                                                   |
| Baseline (n)                               | 8.45 ± 0.24 (55)  | 8.40 ± 0.23 (56)  |                                                   |
| Change (n)                                 | -0.69 ± 0.24 (45) | -0.68 ± 0.23 (48) | 0.02 (-0.68 to 0.64)                              |
| P value                                    | 0.004             | 0.005             | 0.957                                             |
| 2h plasma glucose, mmol/L                  |                   |                   |                                                   |
| Baseline (n)                               | 16.00 ± 0.44 (55) | 15.89 ± 0.42 (55) |                                                   |
| Change (n)                                 | -0.99 ± 0.37 (45) | -1.38 ± 0.37 (45) | 0.39 (-0.66 to 1.44)                              |
| P value                                    | 0.009             | <0.001            | 0.465                                             |
| HbA1c, mmol/mol                            |                   |                   |                                                   |
| Baseline (n)                               | 52.6 ± 1.2 (58)   | 54.1 ± 1.2 (56)   |                                                   |
| Change (n)                                 | -4.4 ± 1.1 (47)   | -5.8 ± 1.1 (49)   | 1.4 (-1.8 to 4.6)                                 |
| P value                                    | <0.001            | <0.001            | 0.384                                             |
| Fasting plasma insulin, pmol/L             |                   |                   |                                                   |
| Baseline (n)                               | 120.9 ± 8.1 (58)  | 104.9 ± 7.9 (57)  |                                                   |
| Change (n)                                 | -20.6 ± 6.8 (46)  | 10.1 ± 6.7 (48)   | -30.7 (-49.6 to -11.9)                            |
| P value                                    | 0.003             | 0.132             | 0.002                                             |
| HOMA-IR                                    |                   |                   |                                                   |
| Baseline (n)                               | 6.43 ± 0.46 (55)  | 5.57 ± 0.45 (55)  |                                                   |
| Change (n)                                 | -1.44 ± 0.42 (44) | 0.14 ± 0.41 (47)  | -1.58 (-2.76 to -0.41)                            |
| P value                                    | 0.001             | 0.730             | 0.009                                             |

|                             |              |                  |                   |                      |
|-----------------------------|--------------|------------------|-------------------|----------------------|
| Matsuda index               |              |                  |                   |                      |
|                             | Baseline (n) | 2.12 ± 0.18 (53) | 2.20 ± 0.18 (53)  |                      |
|                             | Change (n)   | 0.52 ± 0.17 (41) | -0.01 ± 0.17 (42) | 0.53 (0.07 to 1.00)  |
|                             | P value      | 0.002            | 0.941             | 0.025                |
| Serum calcidiol, nmol/L     |              |                  |                   |                      |
|                             | Baseline (n) | 64.4 ± 3.0 (55)  | 61.7 ± 2.9 (56)   |                      |
|                             | Change (n)   | 17.8 ± 2.8 (43)  | -4.1 ± 2.7 (46)   | 21.9 (14.2 to 29.7)  |
|                             | P value      | <0.001           | 0.134             | <0.001               |
| 10-RM leg press, kg         |              |                  |                   |                      |
|                             | Baseline (n) | 125 ± 9 (53)     | 119 ± 8 (52)      |                      |
|                             | Change (n)   | 49 ± 7 (34)      | 56 ± 7 (39)       | -7 (-27 to 13)       |
|                             | P value      | <0.001           | <0.001            | 0.484                |
| Knee extension power, Watt  |              |                  |                   |                      |
|                             | Baseline (n) | 335 ± 17 (48)    | 341 ± 16 (51)     |                      |
|                             | Change (n)   | 30 ± 8 (34)      | 35 ± 8 (38)       | -5 (-27 to 18)       |
|                             | P value      | <0.001           | <0.001            | 0.677                |
| 400-m walk speed, m/s       |              |                  |                   |                      |
|                             | Baseline (n) | 1.36 ± 0.03 (59) | 1.45 ± 0.03 (56)  |                      |
|                             | Change (n)   | 0.07 ± 0.02 (46) | 0.03 ± 0.02 (49)  | 0.04 (-0.01 to 0.09) |
|                             | P value      | <0.001           | 0.064             | 0.139                |
| Usual gait speed, m/s       |              |                  |                   |                      |
|                             | Baseline (n) | 1.11 ± 0.03 (60) | 1.17 ± 0.03 (58)  |                      |
|                             | Change (n)   | 0.01 ± 0.03 (48) | -0.03 ± 0.03 (51) | 0.04 (-0.04 to 0.11) |
|                             | P value      | 0.830            | 0.283             | 0.366                |
| Chair stand, s              |              |                  |                   |                      |
|                             | Baseline (n) | 12.2 ± 0.3 (60)  | 11.8 ± 0.3 (56)   |                      |
|                             | Change (n)   | -1.4 ± 0.3 (48)  | -1.3 ± 0.3 (48)   | -0.1 (-0.9 to 0.7)   |
|                             | P value      | <0.001           | <0.001            | 0.772                |
| VO <sub>2</sub> peak, l/min |              |                  |                   |                      |
|                             | Baseline (n) | 1.60 ± 0.06 (59) | 1.75 ± 0.05 (58)  |                      |
|                             | Change (n)   | 0.13 ± 0.04 (40) | 0.11 ± 0.04 (46)  | 0.03 (-0.08 to 0.13) |
|                             | P value      | 0.001            | 0.003             | 0.615                |
| PAL                         |              |                  |                   |                      |
|                             | Baseline (n) | 1.18 ± 0.01 (51) | 1.19 ± 0.01 (55)  |                      |
|                             | Change (n)   | 0.01 ± 0.01 (40) | 0.00 ± 0.01 (43)  | 0.01 (-0.02 to 0.04) |
|                             | P value      | 0.259            | 0.714             | 0.576                |

Data are presented as estimated marginal mean ± SE.

<sup>a</sup> Estimate of intervention effect at week 13 by using a mixed linear model including the baseline value in the outcome vector and adjusting for stratification factors (sex and SU-derivate use).

<sup>b</sup> Analysis of body weight, body composition, and anthropometry was based on a modified ITT population, excluding a statistically influential outlier for leg muscle mass (see methods).
