# Supplementary material for: Effect of an Enriched Protein Drink on Muscle Mass and Glycemic Control during Combined Lifestyle Intervention in Older Adults with Obesity and Type 2 Diabetes: A Double-Blind RCT
Source: MDPI journal article supplement (doi:10.3390/nu13010064), 2020-12-28
Supplement: s1 [file s1]

**Table S1.** Outcome measures for body weight, body composition, and anthropometry for test and control group with intervention effect, for ITT population.

|                              | Test group        | Control group     | Intervention effect<br>Beta (95% CI) <sup>a</sup> |
|------------------------------|-------------------|-------------------|---------------------------------------------------|
| Body weight, kg              |                   |                   |                                                   |
| Baseline (n)                 | 96.57 ± 1.96 (62) | 98.97 ± 1.92 (61) |                                                   |
| Change (n)                   | -2.41 ± 0.43 (51) | -2.92 ± 0.41 (54) | 0.50 (-0.67 to 1.68)                              |
| <i>P</i> value               | <0.001            | <0.001            | 0.397                                             |
| BMI, kg/m <sup>2</sup>       |                   |                   |                                                   |
| Baseline (n)                 | 33.1 ± 0.6 (62)   | 33.7 ± 0.6 (61)   |                                                   |
| Change (n)                   | -0.8 ± 0.1 (51)   | -1.0 ± 0.1 (54)   | 0.2 (-0.2 to 0.6)                                 |
| <i>P</i> value               | <0.001            | <0.001            | 0.414                                             |
| Leg muscle mass, kg          |                   |                   |                                                   |
| Baseline (n)                 | 18.84 ± 0.36 (61) | 19.21 ± 0.35 (61) |                                                   |
| Change (n)                   | 0.17 ± 0.11 (50)  | -0.05 ± 0.11 (54) | 0.21 (-0.10 to 0.52)                              |
| <i>P</i> value               | 0.137             | 0.681             | 0.175                                             |
| Appendicular muscle mass, kg |                   |                   |                                                   |
| Baseline (n)                 | 25.39 ± 0.48 (59) | 25.92 ± 0.47 (61) |                                                   |
| Change (n)                   | 0.31 ± 0.14 (48)  | 0.03 ± 0.13 (51)  | 0.27 (-0.11 to 0.66)                              |
| <i>P</i> value               | 0.029             | 0.811             | 0.158                                             |
| Total lean mass, kg          |                   |                   |                                                   |
| Baseline (n)                 | 60.73 ± 1.01 (60) | 62.13 ± 0.99 (61) |                                                   |
| Change (n)                   | 0.42 ± 0.28 (49)  | -0.35 ± 0.28 (52) | 0.77 (-0.01 to 1.56)                              |
| <i>P</i> value               | 0.137             | 0.208             | 0.053                                             |
| Fat mass, kg                 |                   |                   |                                                   |
| Baseline (n)                 | 34.51 ± 1.16 (61) | 35.26 ± 1.13 (61) |                                                   |
| Change (n)                   | -2.68 ± 0.33 (50) | -2.60 ± 0.32 (52) | -0.08 (-1.00 to 0.84)                             |
| <i>P</i> value               | <0.001            | <0.001            | 0.862                                             |
| Waist circumference, cm      |                   |                   |                                                   |
| Baseline (n)                 | 113.3 ± 1.4 (61)  | 115.1 ± 1.3 (60)  |                                                   |
| Change (n)                   | -3.5 ± 0.5 (50)   | -3.7 ± 0.5 (52)   | 0.1 (-1.3 to 1.6)                                 |
| <i>P</i> value               | <0.001            | <0.001            | 0.864                                             |
| VAT, cm <sup>2</sup>         |                   |                   |                                                   |
| Baseline (n)                 | 176.5 ± 7.0 (62)  | 181.0 ± 6.8 (61)  |                                                   |
| Change (n)                   | -19.2 ± 3.9 (51)  | -17.3 ± 3.8 (54)  | -1.9 (-12.7 to 8.9)                               |
| <i>P</i> value               | <0.001            | <0.001            | 0.724                                             |

Data are presented as estimated marginal mean ± SE.

<sup>a</sup> Estimate of intervention effect at week 13 by using a mixed linear model including the baseline value in the outcome vector and adjusting for stratification factors (sex and SU-derivate use).
