# Supplementary material for: Effect of an Enriched Protein Drink on Muscle Mass and Glycemic Control during Combined Lifestyle Intervention in Older Adults with Obesity and Type 2 Diabetes: A Double-Blind RCT
Source: MDPI journal article supplement (doi:10.3390/nu13010064), 2020-12-28
Supplement: s1 [file s1]

**Figure S1.** Identification of subject S094 as statistically influential outlier for leg muscle mass.

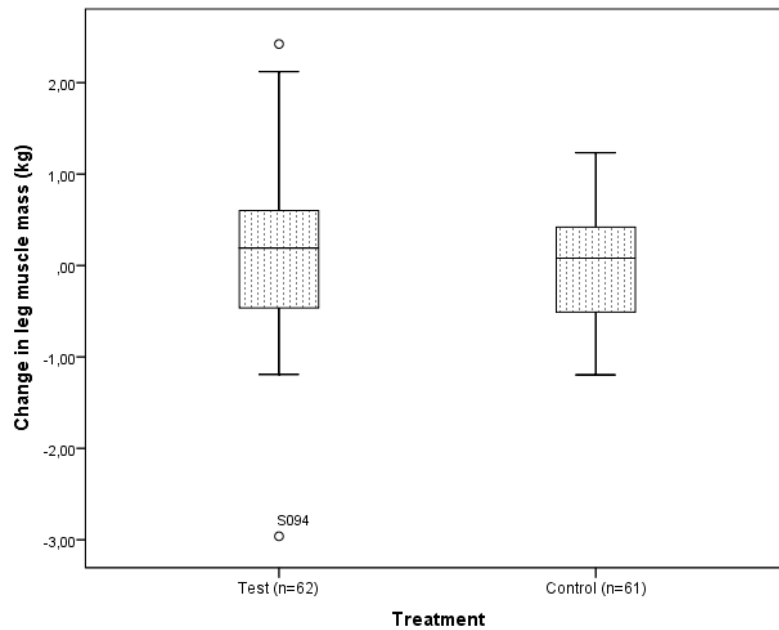

- a) Boxplot for primary outcome parameter leg muscle mass, showing subject S094 as outlier. Whiskers indicate max/min observed value within  $1.5 \times \text{IQR}$  from box. IQR: interquartile range.

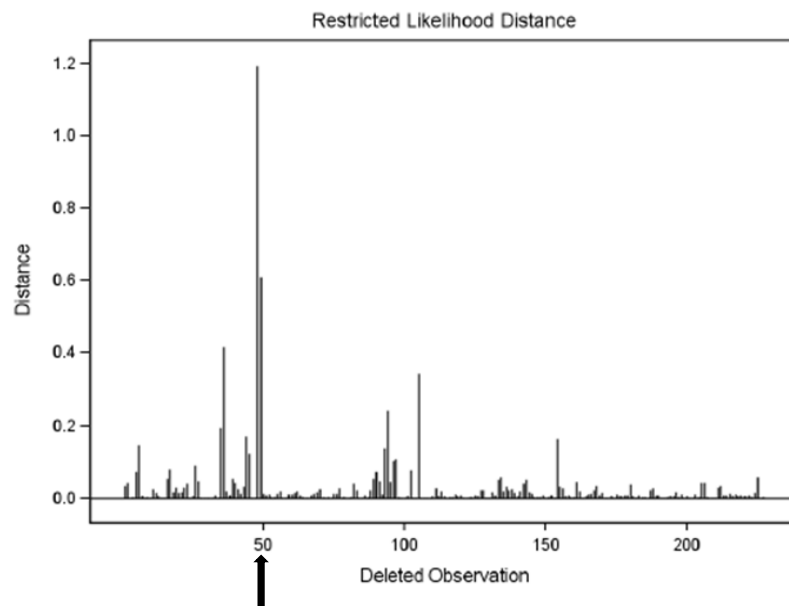

- b) Restricted likelihood distance versus deleted observation, showing subject S094 as statistically influential outlier. This subject reported oedema in the legs at baseline and started on a sodium restricted diet during the study, which can be the explanation for the large reduction in lean mass as detected with DXA.
