# Supplementary material for: Effect of an Enriched Protein Drink on Muscle Mass and Glycemic Control during Combined Lifestyle Intervention in Older Adults with Obesity and Type 2 Diabetes: A Double-Blind RCT
Source: Nutrients. 2020 Dec 28;13(1):64. doi: 10.3390/nu13010064 (PMC7823734; doi:10.3390/nu13010064)
Supplement: Supplementary file 1 [file nutrients-13-00064-s001.zip]

Archive with 4 entries (4 files):
- Document S1.pdf
- Figure S1.pdf
- Table S1.pdf
- Table S2.pdf
